# Supplementary material for: Profiling Synaptic Proteins Identifies Regulators of Insulin Secretion and Lifespan
Source: PubMed Central journal article supplement (PMC2582949; doi:10.1371/journal.pgen.1000283), 2008-11-28

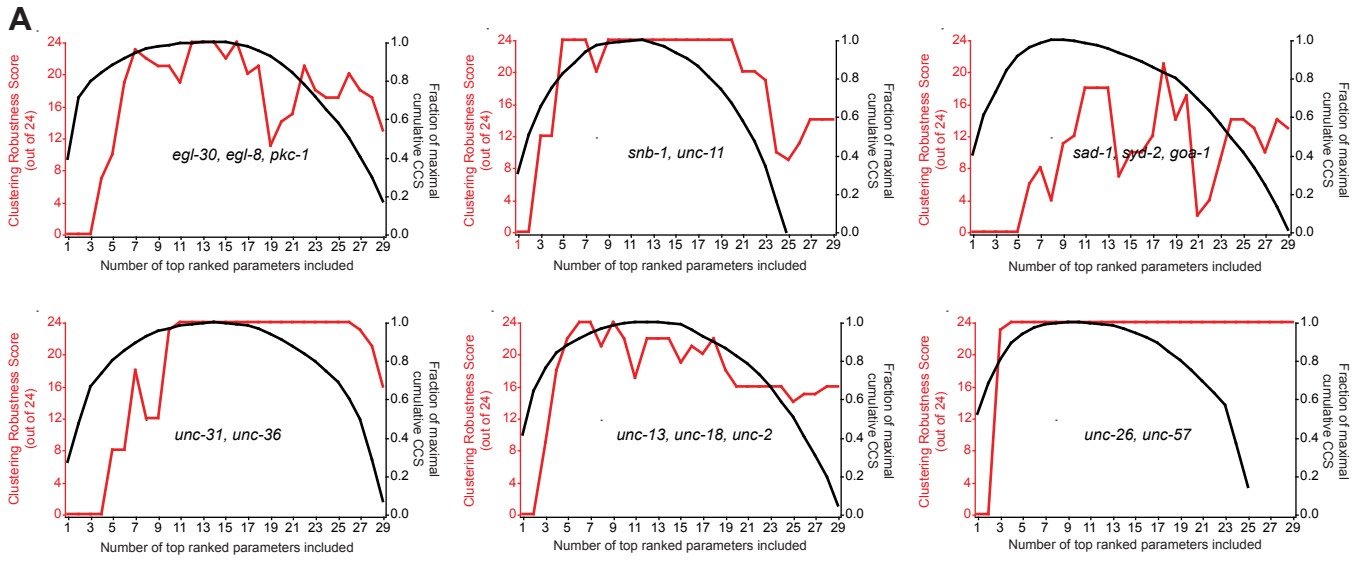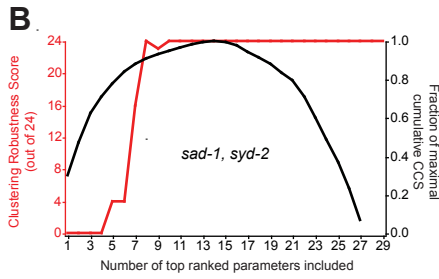

Supplement: pgen.1000283.s001.pdf [file pgen.1000283.s001.pdf]
