# Supplementary material for: Profiling Synaptic Proteins Identifies Regulators of Insulin Secretion and Lifespan
Source: PubMed Central journal article supplement (PMC2582949; doi:10.1371/journal.pgen.1000283), 2008-11-28
Supplement: pgen.1000283.s002.pdf [file pgen.1000283.s002.pdf]

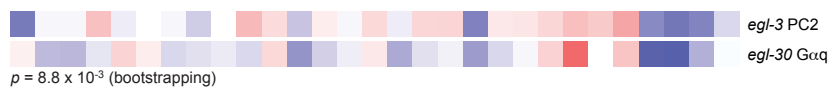

$p = 8.8 \times 10^{-3}$  (bootstrapping)

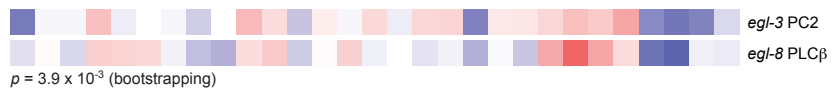

$p = 3.9 \times 10^{-3}$  (bootstrapping)
