# Supplementary material for: Profiling Synaptic Proteins Identifies Regulators of Insulin Secretion and Lifespan
Source: PubMed Central journal article supplement (PMC2582949; doi:10.1371/journal.pgen.1000283), 2008-11-28

## Similarity to SNN-1 Punctal Fluorescence

| Parameter | Correlation      |
|-----------|------------------|
| APT-4     | 0.488196         |
| ITSN-1    | 0.323971         |
| UNC-10    | -0.014186        |
| Gelsolin  | -0.0149626       |
| SYD-2     | -0.101501        |
| INS-22    | <b>-0.15571</b>  |
| SNB-1     | <b>-0.245176</b> |
| RAB-3     | <b>-0.405198</b> |

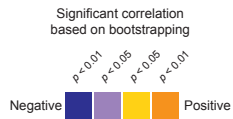

Supplement: pgen.1000283.s003.pdf [file pgen.1000283.s003.pdf]
