# Supplementary material for: Profiling Synaptic Proteins Identifies Regulators of Insulin Secretion and Lifespan
Source: PubMed Central journal article supplement (PMC2582949; doi:10.1371/journal.pgen.1000283), 2008-11-28
Supplement: pgen.1000283.s004.pdf [file pgen.1000283.s004.pdf]

| Genes in Cluster                                                                                                                                      | Clustering Method                  |   |   |                                  |   |   |                             |   |   |               |   |   |                    |   |   |                     |   |   | score |
|-------------------------------------------------------------------------------------------------------------------------------------------------------|------------------------------------|---|---|----------------------------------|---|---|-----------------------------|---|---|---------------|---|---|--------------------|---|---|---------------------|---|---|-------|
|                                                                                                                                                       | Pearson's Correlation (uncentered) |   |   | Pearson's Correlation (centered) |   |   | Spearman's Rank Correlation |   |   | Kendall's Tau |   |   | Euclidean Distance |   |   | City Block Distance |   |   |       |
|                                                                                                                                                       | a                                  | c | m | a                                | c | m | a                           | c | m | a             | c | m | a                  | c | m | a                   | c | m |       |
| aex-6 dgi-1 egl-3 egl-30 egl-8 plx-1 unc-10 unc-31 unc-36 wwp-1                                                                                       |                                    |   |   |                                  |   |   |                             |   |   |               |   |   |                    |   |   |                     |   | 1 |       |
| egl-3 egl-30 egl-30gf egl-8 plx-1 rab-3 unc-13 unc-18 unc-2                                                                                           |                                    |   |   |                                  |   |   |                             |   |   |               |   |   |                    |   |   |                     |   | 1 |       |
| egl-3 egl-30 egl-30gf egl-8 plx-1 rab-3 unc-13 unc-18 unc-2 unc-31                                                                                    |                                    |   |   |                                  |   |   |                             |   |   |               |   |   |                    |   |   |                     |   | 1 |       |
| aex-6 egl-30 egl-30gf egl-8 plx-1 rab-3 sad-1 syd-2 unc-10 unc-13 unc-18 unc-2 unc-31 unc-36                                                          |                                    |   |   |                                  |   |   |                             |   |   |               |   |   |                    |   |   |                     |   | 1 |       |
| egl-3 egl-30 egl-30gf egl-8 rab-3 unc-13 unc-18 unc-2                                                                                                 |                                    |   |   |                                  |   |   |                             |   |   |               |   |   |                    |   |   |                     |   | 1 |       |
| aex-6 egl-30 egl-8 plx-1 unc-10 unc-31 unc-36                                                                                                         |                                    |   |   |                                  |   |   |                             |   |   |               |   |   |                    |   |   |                     |   | 1 |       |
| egl-3 egl-30 egl-8 plx-1 unc-10                                                                                                                       |                                    |   |   |                                  |   |   |                             |   |   |               |   |   |                    |   |   |                     |   | 1 |       |
| aex-6 egl-30gf rab-3 unc-10 unc-13 unc-18 unc-2                                                                                                       |                                    |   |   |                                  |   |   |                             |   |   |               |   |   |                    |   |   |                     |   | 1 |       |
| egl-3 egl-30 egl-8 plx-1 unc-31 unc-36                                                                                                                |                                    |   |   |                                  |   |   |                             |   |   |               |   |   |                    |   |   |                     |   | 1 |       |
| aex-3 aex-6 dgi-1 egl-10 egl-3 egl-30 egl-30gf egl-8 goa-1 plx-1 rab-3 sad-1 snb-1 syd-2 unc-10 unc-11 unc-13 unc-18 unc-2 unc-31 unc-36 wwp-1        |                                    |   |   |                                  |   |   |                             |   |   |               |   |   |                    |   |   |                     |   | 1 |       |
| aex-3 aex-6 dgi-1 egl-10 egl-3 egl-30 egl-30gf egl-8 goa-1 plx-1 rab-3 sad-1 syd-2 unc-11 unc-13 unc-18 unc-2 unc-36 wwp-1                            |                                    |   |   |                                  |   |   |                             |   |   |               |   |   |                    |   |   |                     |   | 1 |       |
| aex-3 aex-6 dgi-1 egl-10 egl-3 egl-30 egl-30gf egl-8 goa-1 plx-1 rab-3 sad-1 syd-2 unc-10 unc-13 unc-18 unc-2 unc-31 unc-36 wwp-1                     |                                    |   |   |                                  |   |   |                             |   |   |               |   |   |                    |   |   |                     |   | 1 |       |
| aex-6 egl-30gf rab-3 unc-10 unc-13 unc-18 unc-2 unc-31                                                                                                |                                    |   |   |                                  |   |   |                             |   |   |               |   |   |                    |   |   |                     |   | 1 |       |
| egl-3 egl-30 egl-8 rab-3                                                                                                                              |                                    |   |   |                                  |   |   |                             |   |   |               |   |   |                    |   |   |                     |   | 1 |       |
| aex-3 dgi-1 egl-10 goa-1 syd-2 unc-10                                                                                                                 |                                    |   |   |                                  |   |   |                             |   |   |               |   |   |                    |   |   |                     |   | 1 |       |
| aex-6 egl-30gf snb-1 unc-10 unc-11 unc-13 unc-18 unc-2                                                                                                |                                    |   |   |                                  |   |   |                             |   |   |               |   |   |                    |   |   |                     |   | 1 |       |
| aex-6 egl-30gf unc-10 unc-2 unc-31 unc-36                                                                                                             |                                    |   |   |                                  |   |   |                             |   |   |               |   |   |                    |   |   |                     |   | 1 |       |
| aex-3 aex-6 dgi-1 egl-10 egl-3 egl-30 egl-30gf egl-8 plx-1 rab-3 sad-1 syd-2 tomo-1 unc-10 unc-13 unc-18 unc-2 unc-26 unc-31 unc-36 unc-57 wwp-1      |                                    |   |   |                                  |   |   |                             |   |   |               |   |   |                    |   |   |                     |   | 1 |       |
| aex-3 egl-10                                                                                                                                          |                                    |   |   |                                  |   |   |                             |   |   |               |   |   |                    |   |   |                     |   | 1 |       |
| aex-6 egl-30gf unc-2 unc-31 unc-36                                                                                                                    |                                    |   |   |                                  |   |   |                             |   |   |               |   |   |                    |   |   |                     |   | 1 |       |
| egl-30 rab-3 unc-13 unc-18 unc-2                                                                                                                      |                                    |   |   |                                  |   |   |                             |   |   |               |   |   |                    |   |   |                     |   | 1 |       |
| aex-3 dgi-1 egl-10 egl-3 egl-30 egl-30gf egl-8 goa-1 plx-1 rab-3 sad-1 syd-2 unc-10 unc-13 unc-18 unc-2 unc-31 unc-36                                 |                                    |   |   |                                  |   |   |                             |   |   |               |   |   |                    |   |   |                     |   | 1 |       |
| rab-3 unc-13 unc-18 unc-2 unc-31 unc-36                                                                                                               |                                    |   |   |                                  |   |   |                             |   |   |               |   |   |                    |   |   |                     |   | 1 |       |
| aex-3 egl-30 rab-3                                                                                                                                    |                                    |   |   |                                  |   |   |                             |   |   |               |   |   |                    |   |   |                     |   | 1 |       |
| sad-1 syd-2 wwp-1                                                                                                                                     |                                    |   |   |                                  |   |   |                             |   |   |               |   |   |                    |   |   |                     |   | 1 |       |
| aex-3 aex-6 dgi-1 egl-3 egl-30 egl-30gf egl-8 plx-1 rab-3 sad-1 syd-2 tomo-1 unc-10 unc-13 unc-18 unc-2 unc-31 unc-36 wwp-1                           |                                    |   |   |                                  |   |   |                             |   |   |               |   |   |                    |   |   |                     |   | 1 |       |
| sad-1 syd-2 wwp-1                                                                                                                                     |                                    |   |   |                                  |   |   |                             |   |   |               |   |   |                    |   |   |                     |   | 1 |       |
| aex-3 egl-30gf unc-10                                                                                                                                 |                                    |   |   |                                  |   |   |                             |   |   |               |   |   |                    |   |   |                     |   | 1 |       |
| aex-6 egl-3 egl-30 egl-30gf egl-8 plx-1 rab-3 unc-10 unc-13 unc-18 unc-2 unc-31                                                                       |                                    |   |   |                                  |   |   |                             |   |   |               |   |   |                    |   |   |                     |   | 1 |       |
| aex-3 aex-6 dgi-1 egl-10 egl-3 egl-30 egl-30gf egl-8 goa-1 plx-1 rab-3 sad-1 syd-2 tomo-1 unc-10 unc-2 unc-26 unc-31 unc-36 unc-57 wwp-1              |                                    |   |   |                                  |   |   |                             |   |   |               |   |   |                    |   |   |                     |   | 1 |       |
| aex-6 snb-1 tomo-1 unc-11 unc-26 unc-57 wwp-1                                                                                                         |                                    |   |   |                                  |   |   |                             |   |   |               |   |   |                    |   |   |                     |   | 1 |       |
| aex-6 dgi-1 egl-3 egl-30 egl-30gf egl-8 plx-1 rab-3 sad-1 syd-2 tomo-1                                                                                |                                    |   |   |                                  |   |   |                             |   |   |               |   |   |                    |   |   |                     |   | 1 |       |
| aex-3 aex-6 dgi-1 egl-10 egl-3 egl-30 egl-30gf egl-8 plx-1 rab-3 sad-1 syd-2 tomo-1 unc-10 unc-2 unc-31 unc-36 wwp-1                                  |                                    |   |   |                                  |   |   |                             |   |   |               |   |   |                    |   |   |                     |   | 1 |       |
| aex-3 egl-30 egl-30gf egl-8 plx-1 rab-3 unc-13 unc-18 unc-2                                                                                           |                                    |   |   |                                  |   |   |                             |   |   |               |   |   |                    |   |   |                     |   | 1 |       |
| aex-6 snb-1 tomo-1 unc-11 unc-26 unc-57 wwp-1                                                                                                         |                                    |   |   |                                  |   |   |                             |   |   |               |   |   |                    |   |   |                     |   | 1 |       |
| aex-3 aex-6 dgi-1 egl-10 egl-3 egl-30 egl-30gf egl-8 goa-1 plx-1 rab-3 sad-1 snb-1 syd-2 unc-10 unc-13 unc-18 unc-2 unc-31 unc-36 wwp-1               |                                    |   |   |                                  |   |   |                             |   |   |               |   |   |                    |   |   |                     |   | 1 |       |
| aex-6 unc-13 unc-18 unc-2 unc-31 unc-36                                                                                                               |                                    |   |   |                                  |   |   |                             |   |   |               |   |   |                    |   |   |                     |   | 1 |       |
| aex-3 dgi-1 egl-10 goa-1 sad-1 syd-2 tomo-1 wwp-1                                                                                                     |                                    |   |   |                                  |   |   |                             |   |   |               |   |   |                    |   |   |                     |   | 1 |       |
| aex-3 aex-6 dgi-1 egl-10 egl-3 egl-30 egl-30gf egl-8 goa-1 plx-1 rab-3 sad-1 syd-2 unc-10 unc-13 unc-18 unc-2 unc-26 unc-31 unc-36 unc-57 wwp-1       |                                    |   |   |                                  |   |   |                             |   |   |               |   |   |                    |   |   |                     |   | 1 |       |
| egl-3 egl-30 egl-8 plx-1 rab-3                                                                                                                        |                                    |   |   |                                  |   |   |                             |   |   |               |   |   |                    |   |   |                     |   | 1 |       |
| aex-6 egl-30gf plx-1 unc-10 unc-13 unc-18 unc-2 unc-31 unc-36                                                                                         |                                    |   |   |                                  |   |   |                             |   |   |               |   |   |                    |   |   |                     |   | 1 |       |
| aex-3 egl-3 egl-30 egl-30gf egl-8 rab-3 unc-13 unc-18 unc-2                                                                                           |                                    |   |   |                                  |   |   |                             |   |   |               |   |   |                    |   |   |                     |   | 1 |       |
| dgi-1 egl-10 egl-3 egl-30 egl-30gf egl-8 goa-1 plx-1 rab-3 sad-1 syd-2 tomo-1 unc-10 unc-13 unc-18 unc-2 unc-31 unc-36 wwp-1                          |                                    |   |   |                                  |   |   |                             |   |   |               |   |   |                    |   |   |                     |   | 1 |       |
| dgi-1 egl-10 egl-3 egl-30 egl-30gf egl-8 goa-1 plx-1 rab-3 sad-1 syd-2 tomo-1 unc-10 unc-13 unc-18 unc-2 unc-31 unc-36 wwp-1                          |                                    |   |   |                                  |   |   |                             |   |   |               |   |   |                    |   |   |                     |   | 1 |       |
| aex-3 egl-3 egl-30 egl-30gf egl-8 rab-3 unc-13 unc-18 unc-2 unc-36                                                                                    |                                    |   |   |                                  |   |   |                             |   |   |               |   |   |                    |   |   |                     |   | 1 |       |
| dgi-1 egl-10 egl-3 egl-30 egl-8 goa-1 plx-1 sad-1 syd-2 tomo-1 unc-36 wwp-1                                                                           |                                    |   |   |                                  |   |   |                             |   |   |               |   |   |                    |   |   |                     |   | 1 |       |
| aex-3 egl-3 egl-30 egl-8 rab-3 wwp-1                                                                                                                  |                                    |   |   |                                  |   |   |                             |   |   |               |   |   |                    |   |   |                     |   | 1 |       |
| dgi-1 egl-3 egl-30 egl-30gf egl-8 plx-1 unc-2 unc-31 unc-36 wwp-1                                                                                     |                                    |   |   |                                  |   |   |                             |   |   |               |   |   |                    |   |   |                     |   | 1 |       |
| aex-3 aex-6 dgi-1 egl-10 egl-3 egl-30 egl-30gf egl-8 plx-1 rab-3 unc-10 unc-13 unc-18 unc-2 unc-26 unc-31 unc-36 unc-57 wwp-1                         |                                    |   |   |                                  |   |   |                             |   |   |               |   |   |                    |   |   |                     |   | 1 |       |
| dgi-1 egl-3 egl-30 egl-8 plx-1 unc-10 wwp-1                                                                                                           |                                    |   |   |                                  |   |   |                             |   |   |               |   |   |                    |   |   |                     |   | 1 |       |
| dgi-1 egl-3 egl-30 egl-8 plx-1 unc-36 wwp-1                                                                                                           |                                    |   |   |                                  |   |   |                             |   |   |               |   |   |                    |   |   |                     |   | 1 |       |
| aex-3 aex-6 dgi-1 egl-10 egl-3 egl-30 egl-30gf egl-8 goa-1 plx-1 rab-3 sad-1 snb-1 syd-2 unc-10 unc-13 unc-18 unc-2 unc-26 unc-31 unc-36 unc-57 wwp-1 |                                    |   |   |                                  |   |   |                             |   |   |               |   |   |                    |   |   |                     |   | 1 |       |
| aex-3 aex-6 dgi-1 egl-10 egl-3 egl-30 egl-30gf egl-8 goa-1 plx-1 rab-3 sad-1 snb-1 syd-2 tomo-1 unc-10 unc-13 unc-18 unc-2 unc-31 unc-36 wwp-1        |                                    |   |   |                                  |   |   |                             |   |   |               |   |   |                    |   |   |                     |   | 1 |       |
| aex-3 aex-6 dgi-1 egl-10 egl-3 egl-30 egl-30gf egl-8 plx-1 rab-3 unc-13 unc-18 unc-2 unc-31 unc-36 wwp-1                                              |                                    |   |   |                                  |   |   |                             |   |   |               |   |   |                    |   |   |                     |   | 1 |       |
| dgi-1 egl-3 egl-30 egl-8 plx-1 wwp-1                                                                                                                  |                                    |   |   |                                  |   |   |                             |   |   |               |   |   |                    |   |   |                     |   | 1 |       |
| dgi-1 goa-1                                                                                                                                           |                                    |   |   |                                  |   |   |                             |   |   |               |   |   |                    |   |   |                     |   | 1 |       |
| aex-6 dgi-1 egl-10 egl-3 egl-30 egl-30gf egl-8 goa-1 plx-1 rab-3 sad-1 snb-1 syd-2 tomo-1 unc-10 unc-11 unc-13 unc-18 unc-2 unc-31 unc-36 wwp-1       |                                    |   |   |                                  |   |   |                             |   |   |               |   |   |                    |   |   |                     |   | 1 |       |
| aex-6 dgi-1 egl-10 egl-3 egl-30 egl-30gf egl-8 goa-1 plx-1 rab-3 sad-1 snb-1 syd-2 tomo-1 unc-10 unc-13 unc-18 unc-2 unc-31 unc-36 wwp-1              |                                    |   |   |                                  |   |   |                             |   |   |               |   |   |                    |   |   |                     |   | 1 |       |
| aex-6 dgi-1 egl-10 egl-3 egl-30 egl-30gf egl-8 goa-1 plx-1 rab-3 sad-1 syd-2 tomo-1 unc-10 unc-13 unc-18 unc-2 unc-31 unc-36 wwp-1                    |                                    |   |   |                                  |   |   |                             |   |   |               |   |   |                    |   |   |                     |   | 1 |       |
| egl-30 egl-8 plx-1 unc-36                                                                                                                             |                                    |   |   |                                  |   |   |                             |   |   |               |   |   |                    |   |   |                     |   | 1 |       |
| aex-3 aex-6 dgi-1 egl-10 egl-3 egl-30 egl-30gf egl-8 goa-1 plx-1 rab-3 sad-1 syd-2 tomo-1 unc-10 unc-13 unc-18 unc-2 unc-31 unc-36 wwp-1              |                                    |   |   |                                  |   |   |                             |   |   |               |   |   |                    |   |   |                     |   | 1 |       |
| aex-3 dgi-1 egl-10 egl-3 egl-30 egl-30gf egl-8 goa-1 plx-1 rab-3 sad-1 syd-2 tomo-1 unc-10 unc-13 unc-18 unc-2 unc-31 unc-36 wwp-1                    |                                    |   |   |                                  |   |   |                             |   |   |               |   |   |                    |   |   |                     |   | 1 |       |
| aex-6 dgi-1 egl-10 egl-3 egl-30 egl-30gf egl-8 plx-1 rab-3 sad-1 syd-2 unc-2 unc-31 unc-36 wwp-1                                                      |                                    |   |   |                                  |   |   |                             |   |   |               |   |   |                    |   |   |                     |   | 1 |       |

Linkage method: a = average, c = centroid, s = single, m = complete.
