# Supplementary material for: Profiling Synaptic Proteins Identifies Regulators of Insulin Secretion and Lifespan
Source: PubMed Central journal article supplement (PMC2582949; doi:10.1371/journal.pgen.1000283), 2008-11-28
Supplement: pgen.1000283.s005.pdf [file pgen.1000283.s005.pdf]

**Table S2 - Quantitative imaging of presynaptic markers**

**Percent difference from wild type controls**

| Marker          | Parameter                  | Mutant        |               |              |               |               |              |              |               |                 |              |              |              |              |               |               |              |              |               |               |              |              |              |              |               |              |      |
|-----------------|----------------------------|---------------|---------------|--------------|---------------|---------------|--------------|--------------|---------------|-----------------|--------------|--------------|--------------|--------------|---------------|---------------|--------------|--------------|---------------|---------------|--------------|--------------|--------------|--------------|---------------|--------------|------|
|                 |                            | <i>unc-13</i> | <i>unc-18</i> | <i>unc-2</i> | <i>unc-10</i> | <i>unc-57</i> | <i>dgk-1</i> | <i>goa-1</i> | <i>egl-30</i> | <i>egl-30gf</i> | <i>egl-3</i> | <i>egl-8</i> | <i>pkc-1</i> | <i>snb-1</i> | <i>unc-31</i> | <i>unc-36</i> | <i>sad-1</i> | <i>syd-2</i> | <i>unc-11</i> | <i>unc-26</i> | <i>tom-1</i> | <i>aex-3</i> | <i>aex-6</i> | <i>rab-3</i> | <i>egl-10</i> | <i>wpp-1</i> |      |
| GFP::SNB-1      | Punctal Fluorescence       | 43%           | 59%           | 44%          | 9%            | -30%          | -9%          | -17%         | 4%            | 27%             | -21%         | -7%          | -7%          |              | 23%           | 12%           | -38%         | -24%         | 25%           | -2%           | 5%           | 8%           | 38%          | 22%          | -41%          | -31%         |      |
|                 | Inter-punctal Fluorescence | -15%          | -19%          | 18%          | -16%          | 15%           | -2%          | -5%          | -14%          | 33%             | -2%          | 2%           | -9%          |              | -13%          | 25%           | -25%         | -15%         | 136%          | 10%           | 42%          | -26%         | 16%          | -18%         | -39%          | -7%          |      |
|                 | Full Width Half Max        | -2%           | -5%           | 6%           | 11%           | -11%          | 4%           | -1%          | -7%           | 0%              | 1%           | -3%          | -6%          |              | -4%           | -5%           | 0%           | -7%          | 22%           | -21%          | -13%         | 5%           | -1%          | 3%           | -2%           | -7%          |      |
| GFP::SYD-2      | Punctal Fluorescence       | 3%            | 7%            | 0%           | 4%            | 5%            | -1%          | 14%          | 8%            | 27%             | 1%           | 7%           | 5%           | -5%          | -5%           | -7%           | 11%          |              | -2%           | 3%            | 12%          | 13%          | 11%          | 23%          | -18%          | 7%           |      |
|                 | Inter-punctal Distance     | -2%           | 1%            | 10%          | -1%           | -8%           | -2%          | 1%           | 3%            | 10%             | -1%          | 7%           | -6%          | 5%           | 2%            | 10%           | 9%           |              | 1%            | -4%           | -2%          | 5%           | 7%           | 6%           | 7%            | 6%           |      |
|                 | Full Width Half Max        | -8%           | -6%           | -1%          | 6%            | 13%           | 2%           | 3%           | -3%           | 4%              | 6%           | 12%          | 0%           |              | -6%           | 0%            | 17%          | -1%          | 19%           | -9%           | -3%          | 3%           | -8%          | -1%          | 0%            | 1%           |      |
| SNN-1::Venus    | Punctal Fluorescence       | -32%          | -48%          | -12%         | -20%          | 7%            | -43%         | -13%         | -5%           | -16%            | -2%          | -3%          | -23%         | -18%         | 16%           | 2%            | -20%         | -35%         | -10%          | 37%           | 8%           | 2%           | -6%          |              | 10%           | -6%          |      |
|                 | Inter-punctal Fluorescence | -26%          | -37%          | -15%         | -24%          | -6%           | -29%         | 3%           | -10%          | -12%            | -15%         | -22%         | -1%          | 6%           | 0%            | 11%           | -5%          | 24%          | 37%           | 13%           | 15%          | 10%          | 8%           |              | -12%          | 15%          |      |
|                 | Inter-punctal Distance     | -14%          | -13%          | -1%          | -11%          | -9%           | 3%           | 3%           | -2%           | -1%             | 0%           | -9%          | -5%          | -9%          | -12%          | -7%           | 6%           | 23%          | -19%          | -12%          | -3%          | -9%          | -13%         |              | 17%           | -1%          |      |
| UNC-10::GFP     | Punctal Fluorescence       | 20%           | 55%           | 17%          |               | 4%            | -8%          | 23%          | -7%           | -11%            | 33%          | 10%          | -15%         | 7%           | -1%           | 4%            | -23%         | -19%         | 27%           | 35%           | -13%         | -26%         | 8%           | -8%          | -17%          | -9%          |      |
|                 | Inter-punctal Distance     | 6%            | 6%            | 7%           |               | -3%           | 3%           | 8%           | 2%            | 18%             | 3%           | 6%           | 5%           | 12%          | 8%            | 7%            | 22%          | 13%          | -6%           | -9%           | 7%           | 11%          | -3%          | 6%           | 23%           | 3%           |      |
|                 | Full Width Half Max        | 26%           | 62%           | 16%          | 1%            | -3%           | -11%         | -12%         | -35%          | -15%            | -21%         | -16%         | -5%          | 61%          | -1%           | 4%            | 0%           | 11%          | 82%           | -11%          | -6%          | -81%         | 11%          |              | -44%          | -2%          |      |
| Venus::RAB-3    | Punctal Fluorescence       | -41%          | -19%          | -13%         | -26%          | -17%          | -9%          | -17%         | -11%          | -20%            | 6%           | 1%           | -5%          | -44%         | -27%          | 5%            | -3%          | -3%          | -30%          | -11%          | 11%          | -55%         | 3%           |              | -42%          | -10%         |      |
|                 | Inter-punctal Fluorescence | -5%           | -9%           | -11%         | -13%          | -6%           | 1%           | -1%          | -3%           | -11%            | -2%          | 7%           | 2%           | -13%         | -1%           | 0%            | 6%           | -6%          | -12%          | 1%            | 5%           | -2%          | -2%          |              | -5%           | 2%           |      |
|                 | Inter-punctal Distance     | -2%           | -8%           | -5%          | -8%           | 0%            | -1%          | -1%          | 1%            | -1%             | 4%           | -2%          | -4%          | 5%           | -4%           | 0%            | 6%           | 2%           | -13%          | 2%            | -1%          | 57%          | -3%          |              | 3%            | -1%          |      |
| Gelsolin::Venus | Punctal Fluorescence       | -32%          | 6%            | -2%          | -8%           | 30%           | -10%         | 37%          | -24%          | 26%             | -9%          | 1%           | -6%          | 33%          | -16%          | -7%           | -15%         | -10%         | 46%           | 11%           | -31%         | -9%          | -4%          | -9%          |               | -33%         | -11% |
|                 | Inter-punctal Fluorescence | -32%          | 16%           | 4%           | 14%           | 39%           | -10%         | 7%           | -10%          | -6%             | 15%          | -9%          | -14%         | 36%          | -24%          | -11%          | -3%          | -3%          | 48%           | 56%           | 2%           | -12%         | 19%          | -4%          |               | -15%         | -13% |
|                 | Inter-punctal Distance     | 17%           | 12%           | -1%          | 2%            | 1%            | 2%           | 5%           | -3%           | -2%             | 1%           | 0%           | -4%          | 11%          | 7%            | 4%            | 3%           | 9%           | 16%           | 11%           | 20%          | 7%           | 1%           | 1%           |               | 8%           | 1%   |
| APT-4::GFP      | Punctal Fluorescence       | -21%          | -25%          | -26%         | -28%          | 21%           |              | 12%          | -21%          | -18%            | -27%         | -12%         | 0%           | -19%         | -6%           | -13%          | -1%          | -14%         | -1%           | 20%           | -4%          |              | -6%          | -5%          |               | -22%         | -7%  |
|                 | Full Width Half Max        | 39%           | 24%           | 30%          | 10%           | 7%            |              | 10%          | -4%           | 13%             | 4%           | -1%          | -7%          | 46%          | 8%            | -12%          | 2%           | 20%          | 44%           | -2%           | 5%           |              | 27%          | 33%          |               | 5%           | -7%  |
|                 | Inter-punctal Distance     | 6%            | 0%            | -1%          | 5%            | -10%          |              | 4%           | -1%           | 2%              | 2%           | -6%          | 1%           | 11%          | 2%            | -3%           | 10%          | 12%          | -4%           | -9%           | -1%          | 5%           |              | -7%          |               | 17%          | 1%   |
| INS-22::Venus   | Punctal Fluorescence       | 32%           | 28%           | 13%          | 2%            | -14%          | -21%         | -36%         | 9%            | 3%              | 15%          | 18%          | 19%          | -39%         | 18%           | 11%           | -43%         | -38%         | -1%           |               |              | -58%         | -19%         | -2%          | 21%           | -26%         | -11% |
|                 | Inter-punctal Fluorescence | 4%            | 6%            | 30%          | -5%           | -8%           | -13%         | -8%          | 36%           | 20%             | 15%          | 37%          | 10%          | -23%         | 15%           | -3%           | -10%         | -14%         | 10%           |               |              | -15%         | -17%         | 9%           | 23%           | 9%           | 11%  |
|                 | Inter-punctal Distance     | 23%           | 30%           | 4%           | 6%            | 4%            | -4%          | -24%         | 0%            | 7%              | 3%           | 8%           | 8%           | -4%          | 6%            | 4%            | -11%         | -13%         | 11%           |               |              | -25%         | 10%          | 0%           | 7%            | -14%         | 0%   |
| ITSN-1::GFP     | Punctal Fluorescence       | 3%            | 2%            | 2%           | -33%          | 27%           | -1%          | -34%         | -28%          | -8%             | -19%         | -24%         | -18%         | -3%          | -13%          | -16%          | -30%         | -40%         | -8%           | 31%           | -17%         | -27%         | -26%         | -14%         | -6%           |              | -18% |
|                 | Inter-punctal Fluorescence | -23%          | -10%          | -11%         | -21%          | -15%          | -13%         | -22%         | -32%          | -20%            | -27%         | -30%         | -22%         | 2%           | -18%          | -26%          | -25%         | -15%         | -11%          | 20%           | -27%         | -25%         | -30%         | -1%          | 11%           |              | -16% |
|                 | Inter-punctal Distance     | -17%          | -7%           | -9%          | -13%          | -3%           | 20%          | -7%          | 1%            | -11%            | -2%          | 0%           | -4%          | 3%           | -3%           | -2%           | 2%           | -16%         | -11%          | -1%           | -4%          | -1%          | -4%          | -4%          |               | 10%          | -6%  |

significant increase relative to wild type ( $p < 0.05$ )      significant decrease relative to wild type ( $p < 0.05$ )

**Student's T-Test p-value between mutant and wild type controls**

| Marker          | Parameter                  | Mutant        |               |              |               |               |              |              |               |                 |              |              |              |              |               |               |              |              |               |               |              |              |              |              |               |              |
|-----------------|----------------------------|---------------|---------------|--------------|---------------|---------------|--------------|--------------|---------------|-----------------|--------------|--------------|--------------|--------------|---------------|---------------|--------------|--------------|---------------|---------------|--------------|--------------|--------------|--------------|---------------|--------------|
|                 |                            | <i>unc-13</i> | <i>unc-18</i> | <i>unc-2</i> | <i>unc-10</i> | <i>unc-57</i> | <i>dgk-1</i> | <i>goa-1</i> | <i>egl-30</i> | <i>egl-30gf</i> | <i>egl-3</i> | <i>egl-8</i> | <i>pkc-1</i> | <i>snb-1</i> | <i>unc-31</i> | <i>unc-36</i> | <i>sad-1</i> | <i>syd-2</i> | <i>unc-11</i> | <i>unc-26</i> | <i>tom-1</i> | <i>aex-3</i> | <i>aex-6</i> | <i>rab-3</i> | <i>egl-10</i> | <i>wpp-1</i> |
| GFP::SNB-1      | Punctal Fluorescence       | 1.9E-02       | 6.3E-14       | 1.4E-08      | 1.2E-01       | 1.2E-07       | 2.1E-01      | 6.0E-04      | 6.4E-01       | 5.3E-06         | 1.4E-05      | 3.3E-01      | 2.2E-01      |              | 1.0E-04       | 1.4E-01       | 1.7E-11      | 7.6E-04      | 2.3E-04       | 3.1E-01       | 5.0E-01      | 7.3E-02      | 6.4E-10      | 1.6E-03      | 3.3E-09       | 2.4E-09      |
|                 | Inter-punctal Fluorescence | 1.4E-01       | 9.2E-04       | 1.4E-03      | 9.5E-04       | 3.1E-02       | 7.0E-01      | 3.4E-01      | 2.2E-02       | 2.2E-09         | 7.9E-01      | 8.6E-01      | 2.2E-01      |              | 1.1E-01       | 9.0E-03       | 7.1E-04      | 1.0E-01      | 7.7E-13       | 2.5E-02       | 1.2E-04      | 1.1E-06      | 5.9E-02      | 5.3E-03      | 9.7E-11       | 2.0E-01      |
|                 | Full Width Half Max        | 1.1E-01       | 2.2E-01       | 2.9E-01      | 4.3E-03       | 1.8E-03       | 2.2E-01      | 5.2E-01      | 1.8E-02       | 8.8E-01         | 8.4E-01      | 1.9E-01      | 1.2E-01      |              | 1.0E-01       | 1.7E-01       | 6.9E-01      | 9.8E-02      | 4.9E-05       | 2.0E-07       | 1.7E-02      | 9.1E-02      | 7.1E-01      | 3.6E-01      | 8.0E-01       | 6.1E-02      |
| GFP::SYD-2      | Punctal Fluorescence       | 8.9E-01       | 2.1E-02       | 6.6E-01      | 8.6E-02       | 1.8E-02       | 9.6E-01      | 2.2E-01      | 4.2E-01       | 8.0E-02         | 3.4E-02      | 1.0E-01      | 6.9E-01      |              | 2.2E-02       | 8.3E-01       | 7.6E-05      | 6.4E-01      | 2.9E-04       | 4.5E-03       | 7.9E-01      | 4.0E-01      | 1.1E-04      | 7.4E-01      | 3.3E-01       | 4.3E-01      |
|                 | Inter-punctal Distance     | 6.1E-01       | 2.0E-01       | 5.2E-01      | 1.6E-01       | 5.4E-01       | 5.1E-01      | 7.6E-04      | 1.5E-01       | 1.2E-08         | 5.5E-01      | 1.4E-01      | 3.0E-01      | 1.7E-01      | 3.3E-01       | 2.6E-01       | 1.8E-01      |              | 9.4E-01       | 3.7E-01       | 7.4E-04      | 1.2E-03      | 4.0E-02      | 1.7E-08      | 1.9E-04       | 2.2E-02      |
|                 | Full Width Half Max        | 1.2E-01       | 6.6E-01       | 2.6E-02      | 6.4E-01       | 2.6E-03       | 5.4E-01      | 9.7E-01      | 5.7E-01       | 1.9E-02         | 9.7E-01      | 1.7E-01      | 3.5E-02      | 5.3E-02      | 5.1E-01       | 9.2E-03       | 3.1E-03      |              | 4.6E-01       | 2.1E-01       | 4.8E-01      | 3.6E-02      | 3.7E-02      | 4.9E-03      | 9.1E-03       | 3.6E-02      |
| SNN-1::Venus    | Punctal Fluorescence       | 1.3E-08       | 1.5E-15       | 2.0E-01      | 6.4E-04       | 6.6E-01       | 4.0E-11      | 1.5E-01      | 1.9E-01       | 6.1E-03         | 8.6E-01      | 6.6E-01      | 1.5E-03      | 2.1E-01      | 4.8E-02       | 9.8E-01       | 4.1E-03      | 1.0E-06      | 1.1E-01       | 2.9E-05       | 1.8E-01      | 4.3E-01      | 5.8E-02      |              | 1.3E-01       | 4.1E-01      |
|                 | Inter-punctal Fluorescence | 7.6E-05       | 6.4E-10       | 2.8E-02      | 1.9E-04       | 3.6E-01       | 6.3E-06      | 2.1E-01      | 3.2E-01       | 6.0E-02         | 9.4E-02      | 2.7E-03      | 8.8E-01      | 3.0E-01      | 9.4E-01       | 1.3E-02       | 2.2E-01      | 3.0E-05      | 6.1E-11       | 1.9E-03       | 8.7E-03      | 1.9E-02      | 3.7E-02      |              | 5.2E-04       | 4.2E-04      |
|                 | Inter-punctal Distance     | 3.7E-10       | 1.3E-06       | 8.2E-01      | 2.0E-05       | 1.7E-03       | 3.0E-01      | 1.4E-01      | 5.3E-01       | 8.2E-01         | 9.6E-01      | 8.0E-03      | 3.5E-01      | 3.1E-03      | 1.7E-05       | 1.6E-03       | 3.7E-02      | 6.2E-03      | 1.8E-07       | 3.1E-05       | 2.7E-01      | 1.2E-02      | 3.8E-07      |              | 2.0E-04       | 6.5E-01      |
| UNC-10::GFP     | Punctal Fluorescence       | 4.6E-02       | 9.1E-04       | 2.0E-01      |               | 5.5E-01       | 1.1E-01      | 1.5E-02      | 2.0E-01       | 6.6E-02         | 2.0E-02      | 2.7E-01      | 2.1E-01      | 3.0E-01      | 7.4E-01       | 4.9E-01       | 2.3E-02      | 1.1E-02      | 5.9E-02       | 2.2E-03       | 1.1E-01      | 5.5E-04      | 3.5E-01      | 5.0E-01      | 1.6E-04       | 3.3E-01      |
|                 | Inter-punctal Distance     | 1.9E-02       | 4.9E-03       | 8.5E-02      |               | 6.1E-01       | 7.7E-02      | 6.8E-03      | 2.1E-01       | 4.0E-05         | 2.4E-01      | 7.6E-02      | 9.6E-02      | 1.1E-04      | 3.0E-02       | 2.1E-01       | 3.2E-06      | 3.2E-03      | 4.4E-02       | 3.2E-05       | 3.9E-02      | 1.3E-04      | 2.6E-01      | 3.5E-02      | 5.4E-06       | 3.3E-01      |
|                 | Full Width Half Max        | 2.0E-03       | 2.6E-03       | 1.6E-01      | 4.9E-01       | 9.8E-01       | 4.4E-01      | 3.2E-01      | 3.1E-05       | 1.6E-01         | 5.1E-02      | 8.7E-02      | 8.6E-01      | 2.0E-06      | 9.1E-01       | 4.3E-01       | 9.1E-01      | 1.9E-01      | 1.9E-09       | 4.4E-01       | 6.0E-01      | 2.8E-25      | 8.6E-02      |              | 2.0E-05       | 5.1E-01      |
| Venus::RAB-3    | Punctal Fluorescence       | 2.4E-09       | 1.1E-01       | 1.2E-01      | 1.8E-05       | 1.5E-03       | 1.7E-01      | 1.5E-02      | 1.2E-01       | 2.4E-04         | 6.8E-01      | 9.0E-01      | 4.9E-01      | 9.1E-11      | 3.2E-06       | 5.8E-01       | 7.3E-01      | 6.8E-01      | 2.4E-04       | 4.7E-02       | 1.8E-01      | 1.4E-22      | 6.9E-01      |              | 2.3E-12       | 6.1E-02      |
|                 | Inter-punctal Fluorescence | 5.3E-02       | 3.5E-03       | 1.5E-03      | 3.2E-04       | 1.5E-01       | 9.3E-01      | 9.5E-01      | 5.8E-01       | 4.9E-03         | 8.4E-01      | 1.1E-01      | 7.9E-01      | 9.7E-05      | 6.1E-01       | 9.1E-01       | 1.8E-01      | 2.5E-01      | 5.0E-06       | 6.9E-01       | 3.0E-01      | 1.1E-01      | 3.1E-01      |              | 6.3E-01       | 6.3E-01      |
|                 | Inter-punctal Distance     | 1.2E-01       | 2.1E-04       | 5.8E-01      | 2.1E-02       | 6.7E-01       | 5.2E-01      | 4.2E-01      | 5.6E-01       | 4.0E-01         | 2.1E-01      | 6.4E-01      | 7.4E-02      | 1.7E-01      | 1.4E-01       | 5.3E-01       | 1.0E-01      | 4.9E-01      | 4.4E-06       | 3.7E-01       | 8.6E-01      | 7.4E-06      | 7.1E-01      |              | 9.1E-02       | 7.4E-01      |
| Gelsolin::Venus | Punctal Fluorescence       | 3.5E-05       | 2.3E-01       | 9.7E-01      | 6.6E-01       | 1.3E-03       | 2.1E-01      | 9.5E-07      | 5.2E-03       | 2.8E-03         | 5.8E-01      | 9.8E-01      | 2.4E-01      | 1.4E-05      | 1.2E-02       | 1.7E-01       | 2.0E-02      | 1.3E-01      | 4.1E-04       | 4.9E-02       | 4.0E-05      | 1.6E-01      | 6.2E-01      |              | 2.3E-06       | 1.4E-01      |
|                 | Inter-punctal Fluorescence | 1.6E-05       | 1.4E-01       | 6.9E-01      | 2.0E-01       | 3.1E-04       | 2.2E-01      | 4.2E-01      | 2.4E-01       | 4.8E-01         |              |              |              |              |               |               |              |              |               |               |              |              |              |              |               |              |
