# Supplementary material for: Profiling Synaptic Proteins Identifies Regulators of Insulin Secretion and Lifespan
Source: PubMed Central journal article supplement (PMC2582949; doi:10.1371/journal.pgen.1000283), 2008-11-28
Supplement: pgen.1000283.s006.pdf [file pgen.1000283.s006.pdf]

Table S3 - Scores for clustering

| Gene            | Marker     |       |       |       |          |       |              |       |       |             |       |              |       |       |       |                 |       |       |            |       |       |               |       |        |       |             |       |       |       |
|-----------------|------------|-------|-------|-------|----------|-------|--------------|-------|-------|-------------|-------|--------------|-------|-------|-------|-----------------|-------|-------|------------|-------|-------|---------------|-------|--------|-------|-------------|-------|-------|-------|
|                 | GFP::SNB-1 |       |       |       | SYD::GFP |       | SNN-1::Venus |       |       | UNC-10::GFP |       | Venus::RAB-3 |       |       |       | Gelsolin::Venus |       |       | APT-4::GFP |       |       | INS-22::Venus |       |        |       | ITSN-1::GFP |       |       |       |
|                 | PF         | IPF   | FWHM  | IPD   | PF       | IPD   | PF           | IPF   | IPD   | PF          | IPD   | PF           | IPF   | FWHM  | IPD   | PF              | IPF   | IPD   | PF         | FWHM  | IPD   | PF            | IPF   | FWHM   | IPD   | PF          | IPF   | FWHM  | IPD   |
| <i>snb-1</i>    |            |       |       |       | -1.38    | 2.48  | -1.75        | 1.37  | -3.01 | 1.04        | 3.98  | 5.01         | -5.74 | -3.25 | 1.37  | 4.48            | 3.89  | 3.15  | -3.53      | 8.45  | 4.58  | -6.82         | -3.06 | -1.26  | 2.27  | -0.58       | 0.37  | -1.85 | 1.15  |
| <i>unc-13</i>   | 7.36       | -2.07 | -0.69 | -2.34 | 0.52     | -1.21 | -4.81        | -3.40 | -5.98 | 2.42        | 2.39  | 3.18         | -6.57 | -1.70 | -1.36 | -3.65           | -3.28 | 3.86  | -4.54      | 7.68  | 2.70  | 5.09          | 0.63  | 6.75   | 2.83  | 0.19        | -4.33 | -6.83 | -1.56 |
| <i>unc-18</i>   | 8.49       | -3.40 | -1.22 | -2.33 | 1.29     | -0.35 | -6.79        | -4.89 | -5.08 | 4.59        | 2.89  | 3.73         | -1.91 | -2.99 | -3.48 | 1.22            | 1.48  | 3.04  | -3.83      | 4.89  | 0.77  | 5.26          | 0.91  | 8.29   | 6.44  | 0.91        | -1.91 | -2.59 | -0.17 |
| <i>unc-2</i>    | 6.07       | 3.26  | 1.07  | 0.58  | -0.64    | 2.26  | -1.28        | -1.75 | -0.23 | 1.29        | 2.00  | 1.43         | -1.58 | -3.26 | -0.63 | 0.04            | 0.40  | 0.13  | -5.29      | 5.15  | 0.42  | 3.09          | 4.63  | 1.97   | 3.01  | 0.55        | -2.00 | -3.07 | -2.20 |
| <i>unc-31</i>   | 4.00       | -1.59 | -1.63 | -2.32 | -0.98    | 0.67  | 2.00         | 0.07  | -4.44 | -0.33       | 2.21  | -0.11        | -3.57 | -0.51 | -1.49 | -2.55           | -2.86 | 1.55  | -0.37      | 1.03  | 1.04  | 2.79          | 1.01  | 1.06   | 0.03  | -3.17       | -3.66 | 2.12  | 1.43  |
| <i>unc-36</i>   | 2.03       | 2.65  | -1.37 | -0.21 | -1.15    | 2.71  | -0.03        | 2.51  | -3.22 | 0.69        | 1.28  | 0.79         | 0.56  | -0.11 | -0.63 | -1.38           | -1.26 | 1.08  | -1.93      | -2.43 | -1.41 | 2.52          | -0.41 | 1.98   | 1.22  | -2.83       | -3.91 | -0.65 | -0.45 |
| <i>sad-1</i>    | -7.39      | -3.47 | 0.40  | 4.09  | 1.74     | 3.02  | -2.91        | -1.22 | 2.11  | -2.33       | 5.07  | 0.11         | -0.34 | 1.36  | 1.64  | -2.34           | -0.38 | 1.35  | -0.49      | -0.05 | 3.23  | -8.87         | -1.56 | -3.81  | -0.69 | -7.04       | -5.04 | -0.73 | 2.02  |
| <i>syd-2</i>    | -3.44      | -1.64 | -1.67 | 0.47  |          |       | -5.09        | 5.75  | 5.33  | -2.58       | 3.92  | 1.32         | -0.41 | -1.16 | 0.70  | -1.53           | -0.32 | 2.57  | -1.83      | 4.13  | 5.19  | -7.51         | -2.01 | -4.74  | 1.62  | -9.05       | -2.85 | 1.13  | 3.41  |
| <i>unc-10</i>   | 1.56       | -3.38 | 2.91  | 1.73  | 1.42     | -0.38 | -3.04        | -3.26 | -4.43 |             |       | 0.69         | -3.86 | -3.19 | -2.36 | -0.45           | 1.29  | 0.74  | -5.53      | 2.28  | 2.81  | 0.57          | -0.85 | 2.68   | 1.32  | -7.91       | -4.44 | 2.34  | 3.39  |
| <i>unc-11</i>   | 3.78       | 13.75 | 6.25  | 5.85  | -0.08    | 0.74  | -1.60        | 7.09  | -5.50 | 1.92        | -2.05 | 6.54         | -3.79 | -3.26 | -4.83 | 4.81            | 4.72  | 4.30  | -0.24      | 8.98  | -1.80 | -0.46         | 1.46  | 4.22   | 0.51  | -1.43       | -2.12 | -5.81 | -1.92 |
| <i>unc-26</i>   | -1.02      | 2.25  | -5.68 | -2.96 | 0.90     | -1.27 | 5.61         | 3.16  | -4.29 | 4.10        | -3.62 | -0.78        | -1.59 | -0.31 | 0.91  | 1.99            | 6.08  | 3.18  | 4.71       | -0.50 | -3.84 |               |       |        |       | 6.72        | 3.32  | -4.14 | -3.64 |
| <i>unc-57</i>   | -5.62      | 2.18  | -3.18 | 2.39  | 0.73     | -2.54 | 0.40         | -0.82 | -3.20 | 0.60        | -0.51 | -0.03        | -2.89 | -1.45 | -0.43 | 3.31            | 3.75  | 0.35  | 2.85       | 1.40  | -4.55 | -2.58         | -1.51 | 2.12   | 2.83  | 6.18        | -3.02 | -5.24 | -3.01 |
| <i>dgk-1</i>    | -1.25      | -0.39 | 1.22  | 0.05  | -0.66    | -0.62 | -5.86        | -3.88 | 1.04  | -1.61       | 1.79  | -0.78        | -1.39 | 0.08  | -0.65 | -1.25           | -1.22 | 0.34  |            |       |       | -4.24         | -2.45 | -1.55  | 1.32  | -2.29       | -2.44 | -1.18 | -1.32 |
| <i>goa-1</i>    | -3.10      | -0.96 | -0.64 | 1.24  | 3.47     | 0.04  | -1.43        | 1.27  | 1.50  | 2.49        | 2.77  | -0.99        | -2.49 | 0.06  | -0.81 | 5.11            | 0.81  | 1.10  | 2.20       | 1.38  | 1.66  | -8.26         | -1.47 | -10.99 | 3.52  | -6.11       | -4.01 | 7.39  | 3.45  |
| <i>tomo-1</i>   | 0.69       | 4.54  | -2.45 | 0.27  | 3.46     | -0.70 | 1.34         | 3.48  | -1.10 | -1.61       | 2.13  | -0.53        | 1.34  | 1.05  | -0.18 | -4.23           | 0.17  | 4.85  | -0.72      | 1.08  | -0.13 | -12.56        | -2.44 | -9.40  | 2.82  | -4.05       | -5.19 | -1.39 | -0.99 |
| <i>aex-3</i>    | 1.81       | -3.46 | 1.70  | 0.85  | 3.31     | 2.12  | 0.80         | 2.38  | -2.53 | -3.54       | 3.94  | -7.57        | -7.01 | -1.61 | 9.81  | -1.40           | -1.51 | 2.22  |            |       |       | -3.60         | -2.69 | 3.63   | 3.32  | -5.89       | -5.08 | -0.23 | -0.85 |
| <i>aex-6</i>    | 6.61       | 1.90  | -0.37 | -3.19 | 2.10     | 2.06  | -1.42        | 2.11  | -5.31 | 0.93        | -1.13 | 1.73         | 0.40  | -1.02 | -0.37 | -0.49           | 2.03  | 0.34  | -0.64      | 4.12  | 1.82  | -0.64         | 1.20  | 0.00   | 0.48  | -6.10       | -5.89 | -1.65 | -0.79 |
| <i>rab-3</i>    | 3.21       | -2.25 | 0.93  | -0.34 | 6.01     | 2.86  |              |       |       | -0.68       | 2.14  |              |       |       |       | -1.42           | -0.52 | 0.77  | -0.83      | 6.20  | -3.28 | 4.12          | 3.00  | 2.03   | 1.01  | -3.07       | -0.21 | -1.63 | -1.81 |
| <i>egl-10</i>   | -6.30      | -4.80 | 0.26  | 0.97  | -3.95    | 2.40  | 1.51         | -3.54 | 5.58  | -4.19       | 5.02  | -4.45        | -6.05 | -0.61 | 2.36  | -4.90           | -1.65 | 2.98  | -4.75      | 1.20  | 6.77  | -4.88         | 1.12  | -5.06  | 1.53  | -1.69       | 2.26  | 3.40  | 7.37  |
| <i>egl-3</i>    | -4.52      | -0.27 | -0.20 | 2.14  | -0.60    | 0.04  | -0.18        | -1.69 | 0.05  | 2.37        | 1.19  | -1.98        | 0.55  | -0.20 | 1.27  | -0.56           | 1.37  | 1.43  | -4.25      | 0.75  | 0.84  | 1.38          | 2.21  | 1.80   | 3.05  | -3.92       | -4.65 | -4.13 | -1.24 |
| <i>egl-30</i>   | 0.46       | -2.33 | -2.39 | -0.80 | 1.46     | 0.58  | -1.31        | -0.99 | -0.63 | -1.29       | 1.26  | -3.63        | -1.58 | -0.55 | 0.76  | -2.87           | -1.00 | -0.40 | -3.36      | -1.31 | -0.25 | 1.54          | 5.27  | 0.09   | 2.02  | -5.85       | -6.08 | -2.66 | -0.05 |
| <i>egl-30gf</i> | 4.76       | 6.45  | 0.16  | 1.77  | 6.14     | 1.98  | -2.17        | -1.40 | 0.28  | -1.86       | 5.46  | -1.41        | -3.63 | -2.87 | -0.85 | 3.07            | -0.62 | -1.29 | -3.31      | 2.65  | 1.04  | 1.28          | 2.96  | 3.08   | 3.43  | -1.92       | -3.69 | 0.53  | -0.18 |
| <i>egl-8</i>    | -0.98      | 0.18  | -1.31 | 1.64  | 1.48     | 1.38  | -0.44        | -2.17 | -2.70 | 1.12        | 1.80  | -1.73        | 0.12  | 1.62  | -0.47 | 0.03            | -0.85 | -0.42 | -2.66      | -0.09 | -1.93 | 2.97          | 5.42  | 3.10   | 1.17  | -4.77       | -5.77 | -0.49 | -0.62 |
| <i>pkc-1</i>    | -1.23      | -1.24 | -1.58 | 0.40  | 1.05     | -1.78 | -2.84        | -0.15 | -0.94 | -1.25       | 1.68  | -0.17        | -0.70 | 0.27  | -1.81 | -1.19           | -1.62 | -1.36 | 0.05       | -1.28 | 0.39  | 3.51          | 1.76  | 3.82   | 0.57  | -4.08       | -4.05 | 0.25  | 0.11  |
| <i>wwp-1</i>    | -5.25      | -0.97 | -1.89 | 1.00  | 2.32     | 2.12  | -0.82        | 3.61  | -0.59 | -0.98       | 1.36  | -0.66        | -1.34 | 0.49  | -0.34 | -1.48           | -1.57 | 0.31  | -1.43      | -1.50 | 0.94  | -2.23         | 1.62  | -0.60  | 0.94  | -3.72       | -2.86 | -2.45 | -1.63 |

PF = punctal fluorescence, IPF = Inter-punctal fluorescence, FWHM = Full Width at Half Maximal, IPD = Inter-punctal Distance.
